## CORRECTION

# Correction: Mental health and quality of life outcomes in family members of patients with chronic critical illness admitted to the intensive care units of two Brazilian hospitals serving the extremes of the socioeconomic spectrum

Renata Rego Lins Fumis, Antonio Bento Ferraz, Isac de Castro, Henrique Souza Barros de Oliveira, Marcelo Mook, M. V. Vieira Junior

The sixth author's name is listed incorrectly in the citation. The correct citation is: Fumis RRL, Ferraz AB, de Castro I, Barros de Oliveira HS, Mook M, Vieira Junior MV (2019) Mental health and quality of life outcomes in family members of patients with chronic critical illness admitted to the intensive care units of two Brazilian hospitals serving the extremes of the socioeconomic spectrum. PLoS ONE 14(9): e0221218. <https://doi.org/10.1371/journal.pone.0221218>

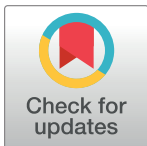

## Reference

1. Fumis RRL, Ferraz AB, de Castro I, Barros de Oliveira HS, Mook M, Junior JMV (2019) Mental health and quality of life outcomes in family members of patients with chronic critical illness admitted to the intensive care units of two Brazilian hospitals serving the extremes of the socioeconomic spectrum. PLoS ONE 14(9): e0221218. <https://doi.org/10.1371/journal.pone.0221218> PMID: 31518359

## OPEN ACCESS

**Citation:** Fumis RRL, Ferraz AB, de Castro I, Barros de Oliveira HS, Mook M, Vieira Junior MV (2019) Correction: Mental health and quality of life outcomes in family members of patients with chronic critical illness admitted to the intensive care units of two Brazilian hospitals serving the extremes of the socioeconomic spectrum. PLoS ONE 14(11): e0225235. <https://doi.org/10.1371/journal.pone.0225235>

**Published:** November 14, 2019

**Copyright:** © 2019 Fumis et al. This is an open access article distributed under the terms of the [Creative Commons Attribution License](https://creativecommons.org/licenses/by/4.0/), which permits unrestricted use, distribution, and reproduction in any medium, provided the original author and source are credited.
